# Supplementary material
Source: PubMed Central journal article supplement (PMC3678344)
Supplement: supp_140.13.2765_DEV090639.pdf [file supp_140.13.2765_DEV090639.pdf]

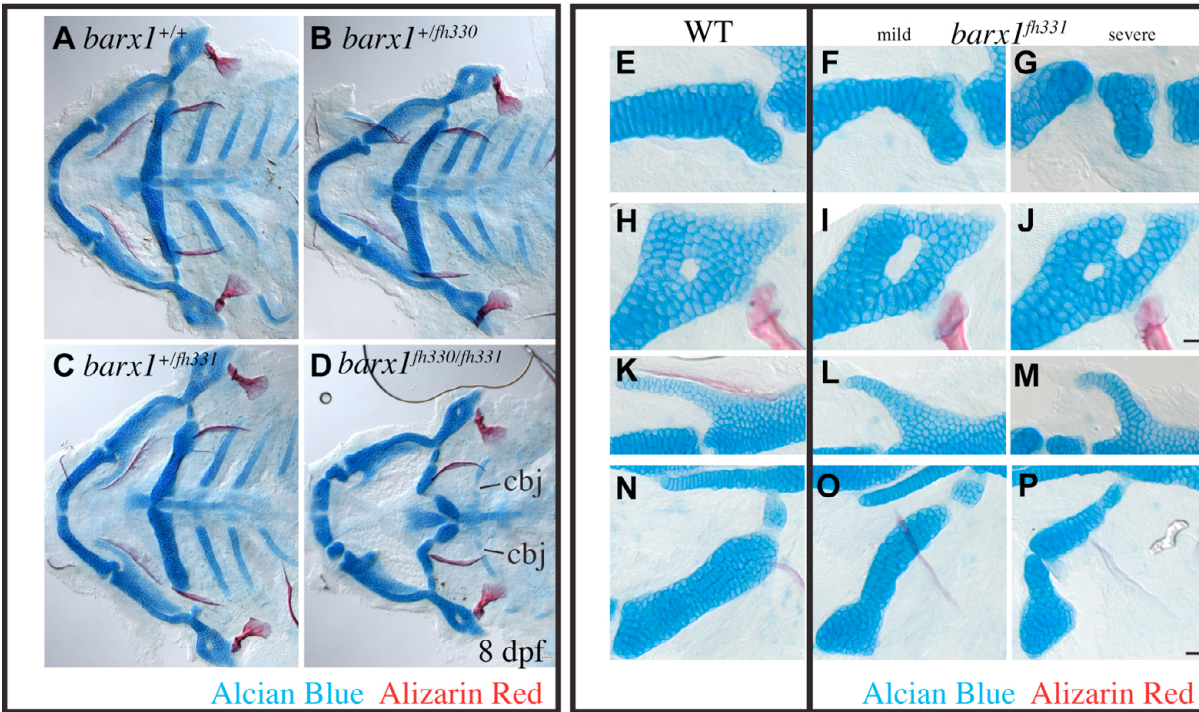

**Fig. S1. Skeletal phenotype variability in *barx1* mutant zebrafish.** (A-D) Zebrafish heterozygous for *barx1*<sup>fh330</sup> and *barx1*<sup>fh331</sup> alleles were crossed and offspring were stained with Alcian Blue and Alizarin Red, dissected and imaged with transmitted light. Genotyped trans-heterozygotes displayed *barx1*-associated phenotypes revealing that these two alleles fail to complement. Anterior is towards the left; left is upwards. (E-P) Alcian Blue- and Alizarin Red-stained larvae were dissected and flat mounts imaged to reveal the range of phenotypic severity found in *barx1* mutants. Anterior is towards the left; dorsal is upwards. Scale bar: 10  $\mu$ m.

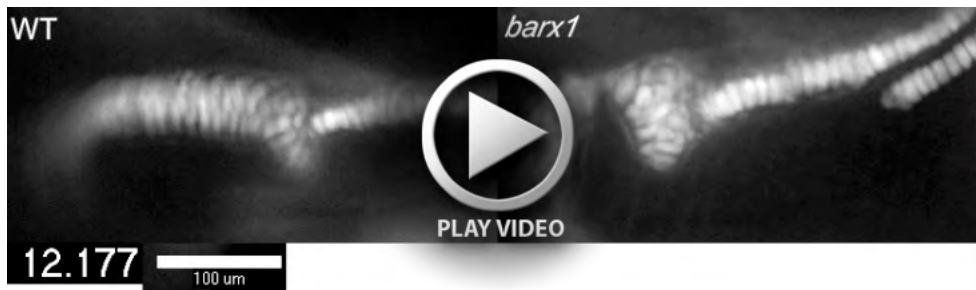

**Movie 1. Joints afford the zebrafish cartilage skeleton flexibility.** 4 dpf *sox9a:EGFP* transgenic zebrafish larvae were anesthetized and laterally mounted in 1.5% agarose in a glass-bottomed dish. Following removal of agarose from just the head, anesthetic was removed and larvae were allowed to recover for several minutes. Non-anesthetized larvae were imaged at six scans/second. In wild-type larvae, skeletal flexibility is evident at the jaw joint between Meckel's cartilage and the palatoquadrate. In *barx1* mutants, skeletal flexibility can be seen at the Meckel's joint, as well as the primary jaw joint. Anterior is towards the left; dorsal is upwards.

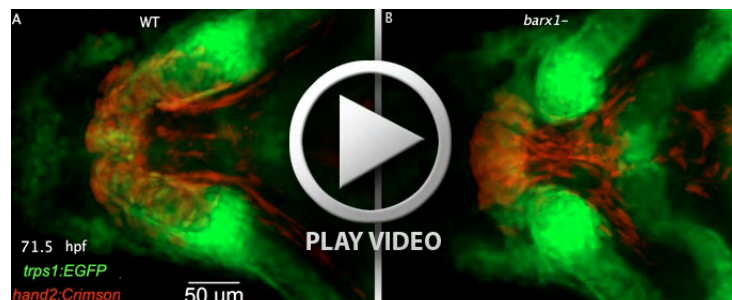

**Movie 2. Subintermediate domain precursors give rise to cartilage in wild type and to joints in *barx1* mutants.** *trps1:EGFP;hand2:Crimson* double-transgenic embryos were ventrally mounted and imaged by time lapse microscopy from 50 to 71.5 hpf. Movies are maximum confocal projections. Anterior is towards the left; left is upwards.

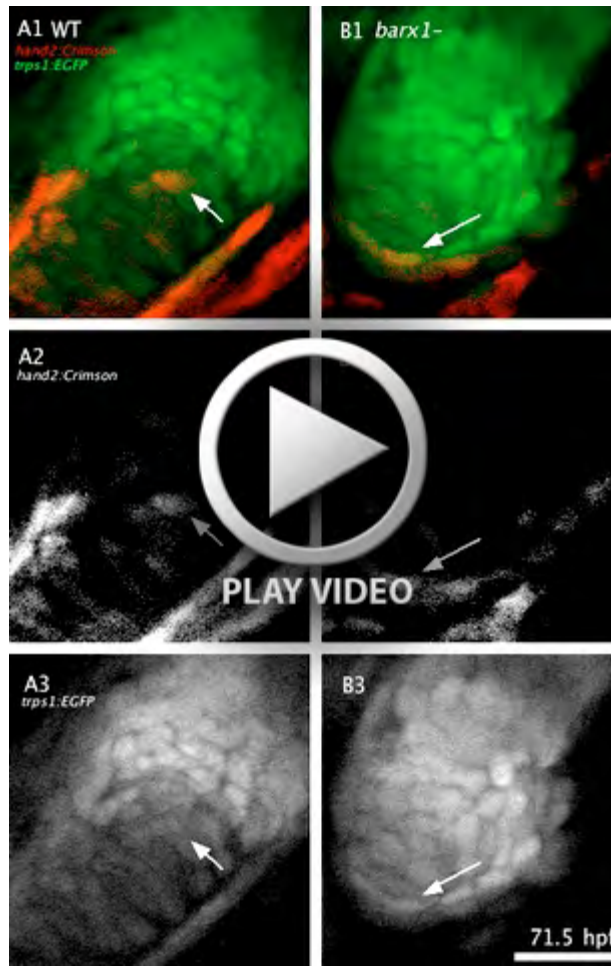

**Movie 3. Cell rearrangement does not contribute to the *barx1* mutant phenotype.** Individual confocal sections were compiled from Movie S2, allowing the tracking of isolated cells (arrows). Cells from similar locations differentiate into chondrocytes in wild types and *trps1:EGFP*-expressing joint cells in *barx1* mutants. *hand2:Crimson* fluorescence was imaged with high gain to image perduring protein even after reporter expression had probably been downregulated. Anterior is towards the left; left is upwards.

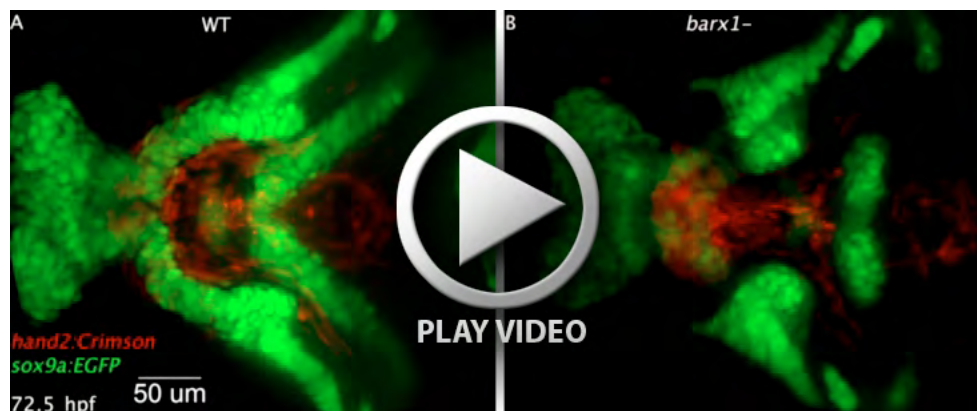

**Movie 4. *barx1* mutant zebrafish fail to downregulate *hand2*, and develop cartilage gaps in the lower jaw.** *sox9a:EGFP;hand2:Crimson* double transgenic embryos were ventrally mounted and imaged by time-lapse microscopy from 50 to 72.5 hpf. Movies are maximum confocal projections. Anterior is towards the left; left is upwards. Wild-type (WT) cells differentiating into chondrocytes of the lower jaw initiate expression of *sox9a:EGFP* (green), while downregulating expression of *hand2:Crimson* (red). By contrast, *barx1* mutants fail to downregulate *hand2:Crimson* and ectopic joints develop in the skeleton.

**Table S1. Arch 1 and 2 skeletal gaps in *barx1* mutant zebrafish**

| <i>barx1</i> allele | % hm notch | % reduced ptp | % mj (complete gap) | % chj (complete gap) | <i>n</i> |
|---------------------|------------|---------------|---------------------|----------------------|----------|
| <i>fh331</i>        | 46         | 95            | 100 (33)            | 100(62)              | 176      |
| <i>fh330</i>        | 56         | 98            | 100 (29)            | 100 (37)             | 52       |

Fixed 4 dpf Alcian Blue/Alizarin red-stained skeletons were scored on both sides for phenotypes. An obviously thin mc or ch was scored as an ectopic joint, the subset of these with a complete gap is shown in parentheses.

*n*, number of sides.

**Table S2. Summary of arch 1 and 2 joints in *barx1;furina* compound mutant zebrafish**

| Genotype                                                    | % hm notch | % reduced ptp | % mj (complete gap) | % chj (complete gap) | % jaw joint loss | % ih joint loss | <i>n</i> |
|-------------------------------------------------------------|------------|---------------|---------------------|----------------------|------------------|-----------------|----------|
| <i>barx1</i> <sup>+/+</sup><br><i>furina</i> <sup>+/+</sup> | 0          | 0             | 0 (0)               | 0 (0)                | <b>0</b>         | 0               | 10       |
| <i>barx1</i> <sup>+/-</sup><br><i>furina</i> <sup>+/+</sup> | 0          | 0             | 0 (0)               | 0 (0)                | <b>0</b>         | 0               | 30       |
| <i>barx1</i> <sup>-/-</sup><br><i>furina</i> <sup>+/+</sup> | 50         | 96            | 100 (60)            | 100(88)              | <b>0</b>         | 0               | 48       |
| <i>barx1</i> <sup>+/+</sup><br><i>furina</i> <sup>+/-</sup> | 0          | 0             | 0 (0)               | 0 (0)                | <b>0</b>         | 0               | 36       |
| <i>barx1</i> <sup>+/-</sup><br><i>furina</i> <sup>+/-</sup> | 0          | 2             | 0 (0)               | 0 (0)                | <b>2</b>         | 2               | 54       |
| <i>barx1</i> <sup>-/-</sup><br><i>furina</i> <sup>+/-</sup> | 37         | 95            | 100 (48)            | 100 (87)             | <b>0</b>         | 0               | 60       |
| <i>barx1</i> <sup>+/+</sup><br><i>furina</i> <sup>-/-</sup> | 2          | 7             | 0 (0)               | 0 (0)                | <b>72</b>        | 69              | 54       |
| <i>barx1</i> <sup>+/-</sup><br><i>furina</i> <sup>-/-</sup> | 8          | 2             | 0 (0)               | 10 (6)               | <b>63</b>        | 60              | 120      |
| <i>barx1</i> <sup>-/-</sup><br><i>furina</i> <sup>-/-</sup> | 91         | 98            | 93 (38)             | 47 (22) *            | <b>33</b>        | 3               | 58       |

Fixed 4 dpf Alcian Blue/Alizarin Red-stained skeletons were scored on both sides for phenotypes. An obviously thin mc or ch was scored as an ectopic joint, the subset of these with a complete gap is shown in parentheses.

First arch joint-loss phenotype typical of *furina* mutants shown in bold.

*n*, number of sides.

\*Severe loss of ventral arch two cartilage in some individuals precludes the detection of ch joint.

**Table S3. Summary of arch 1 and 2 joints in *barx1;hand2* compound mutant zebrafish**

| Genotype                                                   | % hm notch | % reduced ptp | % mj (complete gap) | % jaw joint loss | <i>n</i> |
|------------------------------------------------------------|------------|---------------|---------------------|------------------|----------|
| <i>barx1</i> <sup>+/+</sup><br><i>hand2</i> <sup>+/?</sup> | 0          | 0             | 0 (0)               | <b>0</b>         | 32       |
| <i>barx1</i> <sup>+/-</sup><br><i>hand2</i> <sup>+/?</sup> | 0          | 3             | 3 (0)               | <b>0</b>         | 68       |
| <i>barx1</i> <sup>-/-</sup><br><i>hand2</i> <sup>+/?</sup> | 52         | 100           | 100 (24)            | <b>0</b>         | 58       |
| <i>barx1</i> <sup>+/+</sup><br><i>hand2</i> <sup>-/-</sup> | 3          | 0             | 0 (0)               | <b>96</b>        | 26       |
| <i>barx1</i> <sup>+/-</sup><br><i>hand2</i> <sup>-/-</sup> | 6          | 2             | 0 (0)               | <b>97</b>        | 118      |
| <i>barx1</i> <sup>-/-</sup><br><i>hand2</i> <sup>-/-</sup> | 95         | 100           | 0 (0)               | <b>100</b>       | 44       |

Fixed 4 dpf Alcian Blue/Alizarin Red-stained skeletons were scored on both sides for phenotypes. An obviously thin mc or ch was scored as an ectopic joint, the subset of these with a complete gap is shown in parentheses.

*n*, number of sides.

The first arch joint-loss phenotype typical of *hand2* mutants is shown in bold.
